# Supplementary material
Source: Research Square preprint supplement (doi:10.21203/rs.3.rs-9247677/v1)
Supplement: Supplementary file 1 [file d99f5c88758efbc4198b5627.docx]

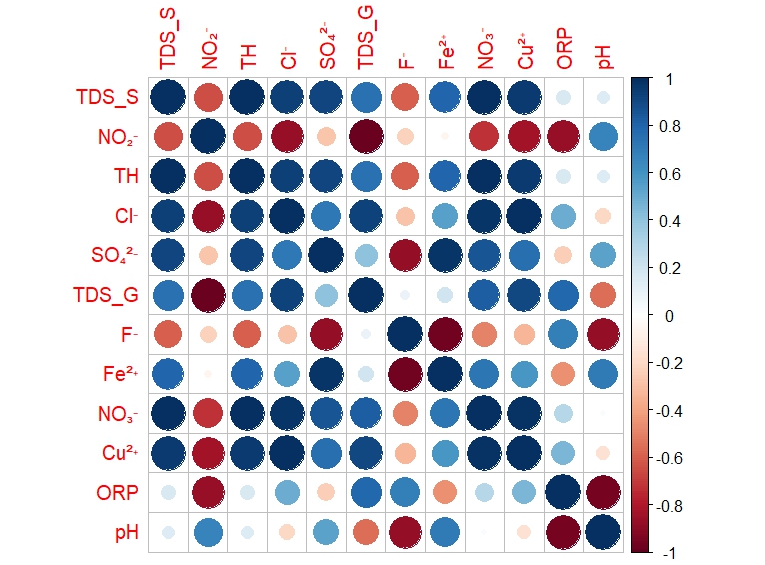


**Fig. S1.** Correlation matrix of hydrogeochemical parameters


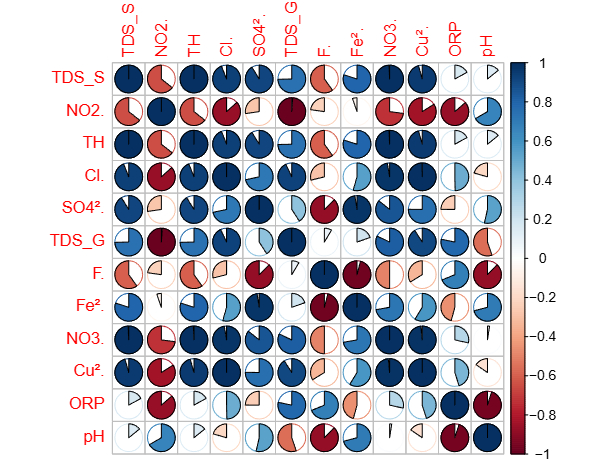


**Fig. S2.** Correlation matrix of hydrogeochemical parameters
